# Supplementary material
Source: PubMed Central journal article supplement (PMC6035113)
Supplement: NIHMS965816-supplement-1.pdf [file NIHMS965816-supplement-1.pdf]

**Supplementary Table 1:** List of genes included in the capture sequencing panel

|    | Gene          | Ensembl ID      | Chromosome | Coordinates (hg38) |           |
|----|---------------|-----------------|------------|--------------------|-----------|
|    |               |                 |            | Gene_start         | Gene_end  |
| 1  | <i>ACVR2A</i> | ENSG00000121989 | 2          | 147844517          | 147930826 |
| 2  | <i>ALB</i>    | ENSG00000163631 | 4          | 73397114           | 73421412  |
| 3  | <i>APOB</i>   | ENSG00000084674 | 2          | 21001429           | 21044073  |
| 4  | <i>ARID1A</i> | ENSG00000117713 | 1          | 26693236           | 26782104  |
| 5  | <i>ARID2</i>  | ENSG00000189079 | 12         | 45729665           | 45908040  |
| 6  | <i>ATM</i>    | ENSG00000149311 | 11         | 108222484          | 108369102 |
| 7  | <i>AXIN1</i>  | ENSG00000103126 | 16         | 287440             | 352673    |
| 8  | <i>BRAF</i>   | ENSG00000157764 | 7          | 140719327          | 140924764 |
| 9  | <i>CCND1</i>  | ENSG00000110092 | 11         | 69641087           | 69654474  |
| 10 | <i>CCNE1</i>  | ENSG00000105173 | 19         | 29811989           | 29824308  |
| 11 | <i>CDK4</i>   | ENSG00000135446 | 12         | 57747727           | 57756013  |
| 12 | <i>CDK6</i>   | ENSG00000105810 | 7          | 92604921           | 92836694  |
| 13 | <i>CDKN2A</i> | ENSG00000147889 | 9          | 21967753           | 21995301  |
| 14 | <i>CDKN2B</i> | ENSG00000147883 | 9          | 22002903           | 22009363  |
| 15 | <i>CTNNB1</i> | ENSG00000168036 | 3          | 41194837           | 41260096  |
| 16 | <i>ERBB3</i>  | ENSG00000065361 | 12         | 56079857           | 56103505  |
| 17 | <i>EGFR</i>   | ENSG00000146648 | 7          | 55019021           | 55211628  |
| 18 | <i>FEZF2</i>  | ENSG00000153266 | 3          | 62369681           | 62374324  |
| 19 | <i>FGA</i>    | ENSG00000171560 | 4          | 154583126          | 154590766 |
| 20 | <i>FGF19</i>  | ENSG00000162344 | 11         | 69698232           | 69704642  |
| 21 | <i>FGF3</i>   | ENSG00000186895 | 11         | 69810224           | 69819024  |
| 22 | <i>FGF4</i>   | ENSG00000075388 | 11         | 69771016           | 69775403  |
| 23 | <i>FLT4</i>   | ENSG00000037280 | 5          | 180601506          | 180649624 |
| 24 | <i>FOXI3</i>  | ENSG00000214336 | 2          | 88446787           | 88452656  |
| 25 | <i>FZR1</i>   | ENSG00000105325 | 19         | 3506273            | 3538330   |
| 26 | <i>H1FNT</i>  | ENSG00000187166 | 12         | 48328980           | 48330279  |
| 27 | <i>HEY1</i>   | ENSG00000164683 | 8          | 79764010           | 79767863  |
| 28 | <i>HNF1A</i>  | ENSG00000135100 | 12         | 120978543          | 121002512 |
| 29 | <i>HRAS</i>   | ENSG00000174775 | 11         | 532242             | 537287    |
| 30 | <i>IDH1</i>   | ENSG00000138413 | 2          | 208236227          | 208266074 |
| 31 | <i>IL6ST</i>  | ENSG00000134352 | 5          | 55935095           | 55994993  |
| 32 | <i>IRF2</i>   | ENSG00000168310 | 4          | 184387713          | 184474580 |
| 33 | <i>JAK1</i>   | ENSG00000162434 | 1          | 64833229           | 64966504  |
| 34 | <i>JAK3</i>   | ENSG00000105639 | 19         | 17824780           | 17848071  |
| 35 | <i>KEAP1</i>  | ENSG00000079999 | 19         | 10486120           | 10503741  |
| 36 | <i>KMT2D</i>  | ENSG00000167548 | 12         | 49018975           | 49059774  |

|    |                      |                 |    |           |           |
|----|----------------------|-----------------|----|-----------|-----------|
| 37 | <i>KRAS</i>          | ENSG00000133703 | 12 | 25204789  | 25250936  |
| 38 | <i>MET</i>           | ENSG00000105976 | 7  | 116672390 | 116798386 |
| 39 | <i>MYC</i>           | ENSG00000136997 | 8  | 127735434 | 127741434 |
| 40 | <i>NCOR1</i>         | ENSG00000141027 | 17 | 16029157  | 16218185  |
| 41 | <i>NFE2L2</i>        | ENSG00000116044 | 2  | 177227595 | 177392697 |
| 42 | <i>NRAS</i>          | ENSG00000213281 | 1  | 114704469 | 114716894 |
| 43 | <i>NTRK3</i>         | ENSG00000140538 | 15 | 87859751  | 88256768  |
| 44 | <i>PDGFRB</i>        | ENSG00000113721 | 5  | 150113837 | 150155872 |
| 45 | <i>PIK3CA</i>        | ENSG00000121879 | 3  | 179148114 | 179240093 |
| 46 | <i>PSMB11</i>        | ENSG00000222028 | 14 | 23042167  | 23044276  |
| 47 | <i>PTEN</i>          | ENSG00000171862 | 10 | 87863113  | 87971930  |
| 48 | <i>PTPN3</i>         | ENSG00000070159 | 9  | 109375466 | 109498313 |
| 49 | <i>RB1</i>           | ENSG00000139687 | 13 | 48303751  | 48481986  |
| 50 | <i>RET</i>           | ENSG00000165731 | 10 | 43077027  | 43130351  |
| 51 | <i>RPS6KA3</i>       | ENSG00000177189 | X  | 20149911  | 20267100  |
| 52 | <i>SMC3</i>          | ENSG00000108055 | 10 | 110567691 | 110604636 |
| 53 | <i>SRCAP</i>         | ENSG00000080603 | 16 | 30698209  | 30741409  |
| 54 | <i>TERT promoter</i> | NA              | 5  | 1295151   | 1295347   |
| 55 | <i>TP53</i>          | ENSG00000141510 | 17 | 7661779   | 7687550   |
| 56 | <i>TSC1</i>          | ENSG00000165699 | 9  | 132891348 | 132944633 |
| 57 | <i>TSC2</i>          | ENSG00000103197 | 16 | 2047465   | 2088720   |
| 58 | <i>VEGFA</i>         | ENSG00000112715 | 6  | 43770184  | 43786487  |
