# Supplementary material
Source: PubMed Central journal article supplement (PMC6035113)
Supplement: NIHMS965816-supplement-2.pdf [file NIHMS965816-supplement-2.pdf]

**Supplementary Table 2:** List of primers and probes used for orthogonal validation

| Gene                               | Ensembl ID      | Chromosome | Sequence (5' to 3')                                                                                                                  |
|------------------------------------|-----------------|------------|--------------------------------------------------------------------------------------------------------------------------------------|
| <b>Sanger sequencing (primers)</b> |                 |            |                                                                                                                                      |
| TERT Promoter                      | ENSG00000164362 | 5          | CAGCGCTGCCTGAAACTC                                                                                                                   |
| <i>BRAF</i> (Pat #7)               | ENSG00000157764 | 12         | GGTGATACAAGCTGGAGCCC                                                                                                                 |
| <i>CTNNB1</i> (Pat #2 and #5)      | ENSG00000168036 | 3          | GATTTGATGGAGTTGGACATGG                                                                                                               |
| <i>JAK1</i>                        | ENSG00000162434 | 1          | CCAGCCTTGATAACATACCG                                                                                                                 |
| <i>PDGFRB</i>                      | ENSG00000113721 | 5          | GGTCAGGCAGGGGGATGATA                                                                                                                 |
| <i>TP53</i> (Pat #3)               | ENSG00000141510 | 17         | TGTTCACTTGTGCCCTGACT                                                                                                                 |
| <i>TP53</i> (Pat #5)               | ENSG00000141510 | 17         | TTACTTTGCACATCTCATGGGG                                                                                                               |
| <b>ddPCR (probes)</b>              |                 |            |                                                                                                                                      |
| <i>BRAF</i> (Pat #7)               | ENSG00000157764 | 12         | TGCCTTTTTTAAAAAAAAAAGC                                                                                                               |
| <i>CTNNB1</i> (Pat #2 and #5)      | ENSG00000168036 | 3          | ATGGCCATGGAACCAGACAGAAAAGCGGCTGTTAGTCACTGGCAGCAACAGTCTTACCTGG[A/C]CTCTGGAATCC<br>ATTCTGGTGCCACTACCACAGCTCCTTCTCTGAGTGGTAAAGGCAATCCT  |
| <i>JAK1</i>                        | ENSG00000162434 | 1          | CCTTAAGATCTCGATTTCCCTTTTTCAGATCAGCTATGTGGTTACCTCCACTCTCAGGCTTC[A/G]GAGATTTAACAGC<br>CACCTGCTCCCCTGTATTGTCCCCTTCGGGGTCATACCTGCAGAGCTC |
| <i>NTRK3</i>                       | ENSG00000140538 | 15         | GGCTCTGGGCTGAATGCTCCGAAGTCTGAGTCTTGTGATGGTCTAGACAGAGAGAAAAAG[A/T]GGATCAGCAGA<br>GCTCAAGTGGCAGAGGGATATCTGCTCTGGGCTGAGGCTGGCAGGGGGTG   |
| <i>PDGFRB</i>                      | ENSG00000113721 | 5          | GACGGAGCTGGTGTCCAGGGGAGATCGGAGGCCATGGAACCCAGGCAAGCGGGCCTGGGAC[C/T]GAAGGATG<br>GCTGGGTGGTCACTCCTCAGAACTCCTCATCCACCTGCTGGTACTTCTGCTC   |
| <i>TP53</i> (Pat #3)               | ENSG00000141510 | 17         | TGTGGAATCAACCCACAGCTGCACAGGGCAGGTCTTGGCCAGTTGGCAAACATCTTGTG[A/C]GGGCAGGGGA<br>GTACTGTAGGAAGAGGAAGGAGACAGAGTTGAAAGTCAGGGCACAAGTGAA    |
| <i>TP53</i> (Pat #5)               | ENSG00000141510 | 17         | CCCCCTCTCCAGAGACCCAGTTGCAAACCAGACCTCAGGCGGCTCATAGGGCACCACCA[CACT/AACG]ATGTC<br>GAAAAGTGTTCGTATCCAAACTCCACAGCAAATTTCTTCCACTCGGATA     |
| <i>TP53</i> (Pat #7)               | ENSG00000141510 | 17         | GTGCAGGGTGGCAAGTGGCTCCTGACCTGGAGTCTTCCAGTGTGATGATGGTGAGGATGGG[C/A]CTCCGGTTC<br>ATGCCGCCATGCAGGAAGTGTACACATGTAGTTGTAGTGGATGGTGGTAC    |
